# Supplementary material
Source: PubMed Central journal article supplement (PMC3640860)

## SUPPLEMENTARY FIGURE LEGENDS

**Supplementary Figure 1. Food consumption of L-FABP (+/+) and L-FABP gene-ablated mice fed control and high-fat diets made available *ad libitum*.** Cumulative food consumption was plotted bi-weekly for L-FABP (+/+) (solid circles) and L-FABP (-/-) (open circles) mice on control diet (A) and high fat diet (B) fed *ad libitum*. As before, the accumulated caloric intake was plotted bi-weekly for the *ad libitum* fed L-FABP (+/+) (solid circles) and L-FABP (-/-) (open circles) mice on control diet (C) and high fat diet (D). Statistical analysis performed by Student's *t*-test with significance  $p \leq 0.05$  represented by \*.

**Supplementary Figure 2. Effect of L-FABP gene-ablation and high-fat diet on body liver weight and liver weight/body weight in *ad libitum*-fed mice.** At the end of the 12 wk dietary study, livers were removed as described in the Methods. The liver weight (A) and liver weight per body weight gain (B) for L-FABP (+/+) (solid bars) and L-FABP (-/-) (open bars) *ad libitum*-fed control and high-fat diets. Values represent the mean  $\pm$  SEM,  $n=5-8$ . Statistical analysis performed by one-way ANOVA with Bonferroni post-tests. The significance was as follows: \*  $p \leq 0.05$  as compared to L-FABP (+/+) control diet; # as compared to L-FABP (-/-) control diet; and \$ as compared to L-FABP (+/+) high-fat diet.

**Supplementary Figure 3. Dual emission X-ray absorptiometry (DEXA) images of L-FABP (+/+) and (-/-) female *ad libitum*-fed mice.** DEXA was performed at the beginning and end of the 12 wk *ad libitum*-fed study. Representative images were selected from the end of the study and show representative *ad libitum*-fed female mice as follows: (A) L-FABP (+/+) on control diet, (B) L-FABP (+/+) on high-fat diet, (C) L-FABP (-/-) on control diet, and (D) L-FABP (-/-) on high-fat diet.

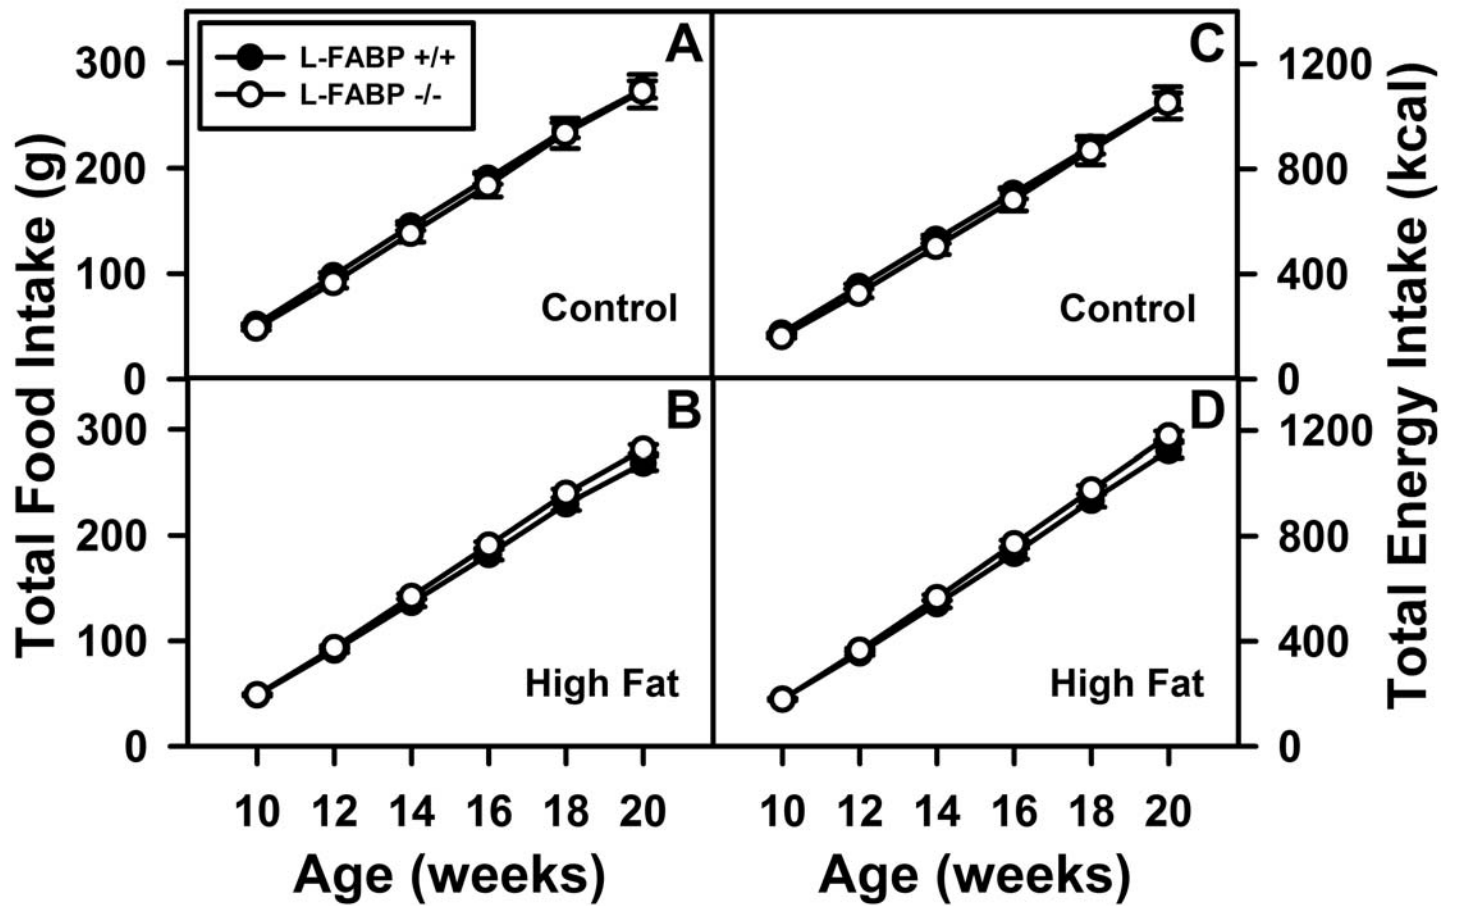

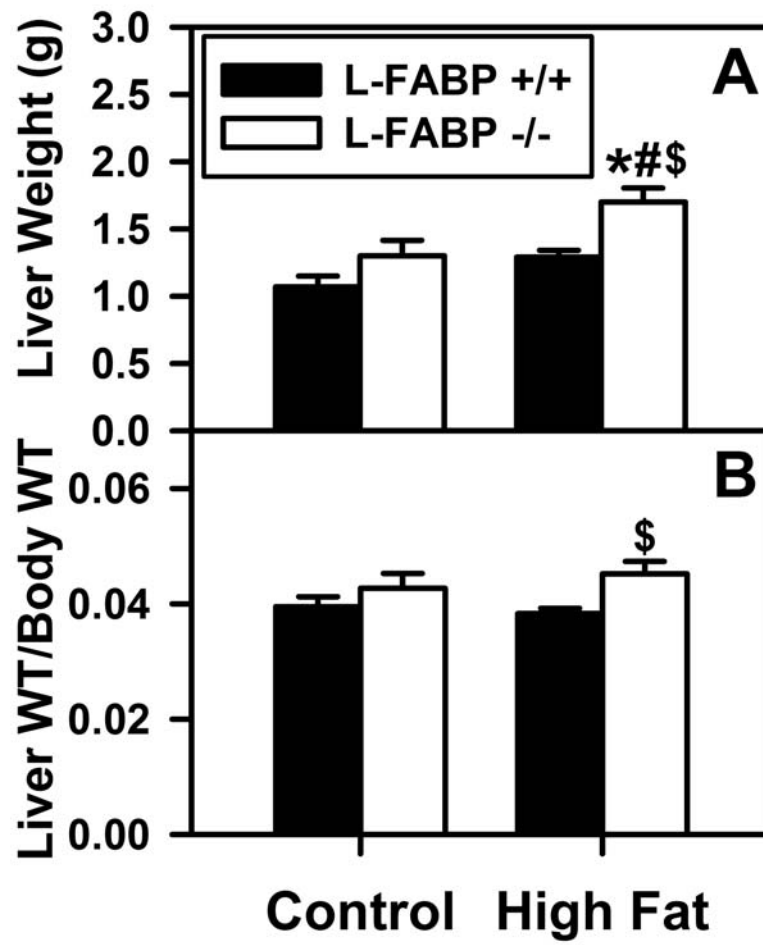

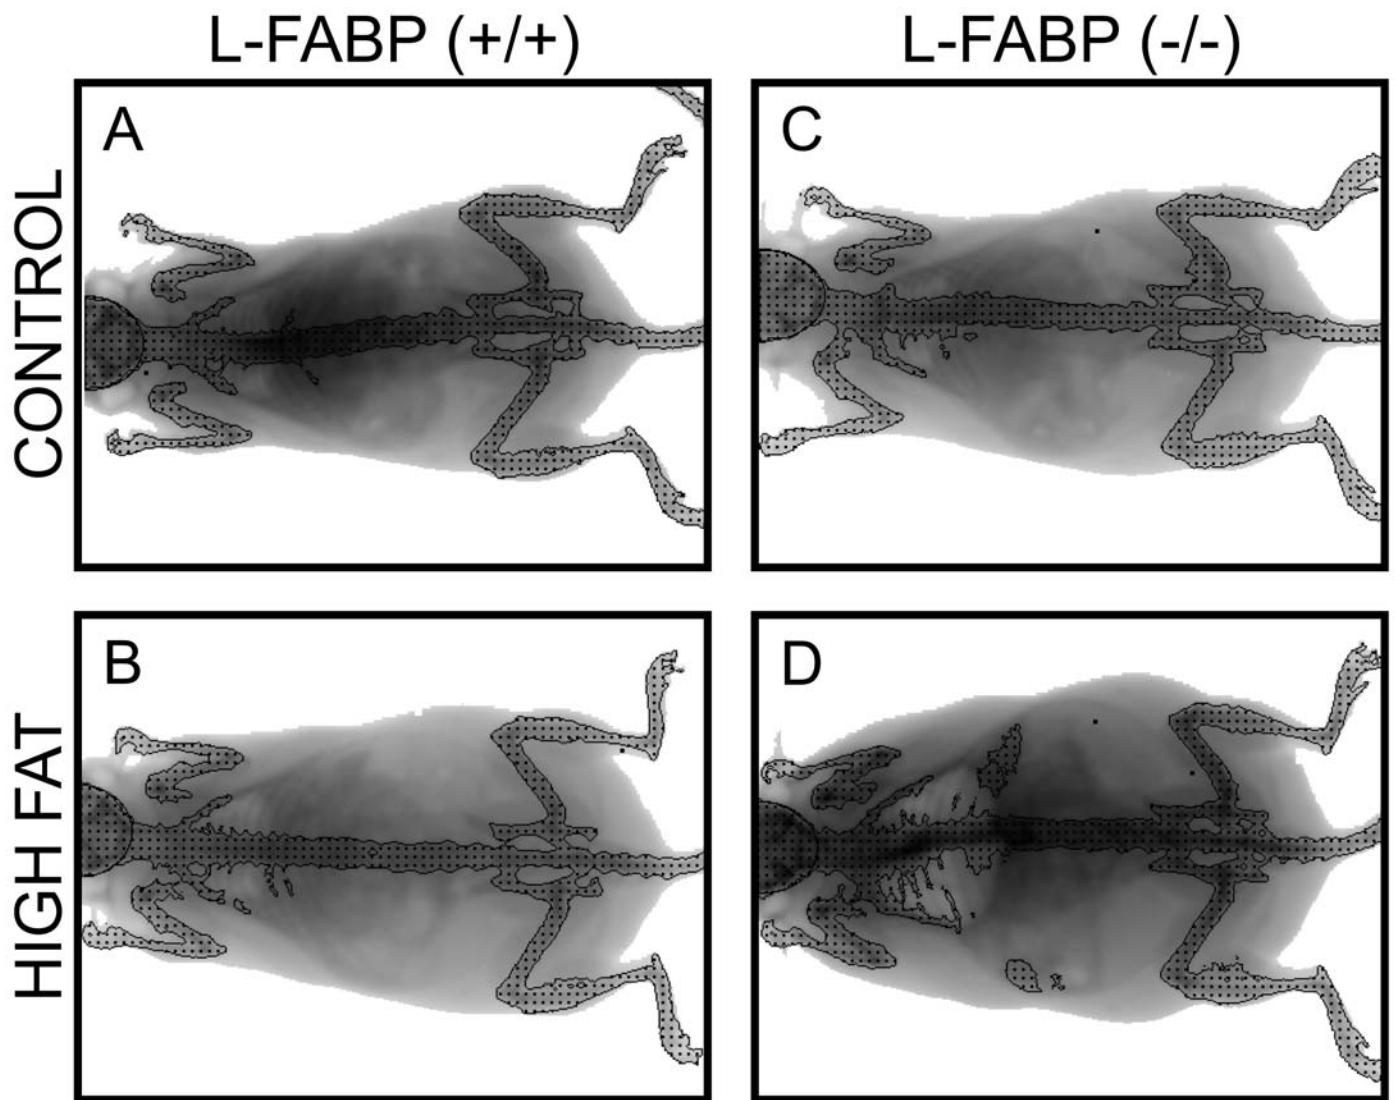

Supplement: NIHMS461800-supplement-11745_2013_3777_MOESM1_ESM.pdf [file NIHMS461800-supplement-11745_2013_3777_MOESM1_ESM.pdf]
